# Supplementary material for: Synergistic lithium storage of a multi-component Co2SnO4/Co3O4/Al2O3/C composite from a single-source precursor
Source: Royal Society of Chemistry journal article supplement (doi:10.1039/c5ra09607c), 2015-01-01
Supplement: c5ra09607c1.pdf [file c5ra09607c1.pdf]

Electronic Supplementary Material (ESI) for RSC Advances.

This journal is © The Royal Society of Chemistry 2015

Figure S1

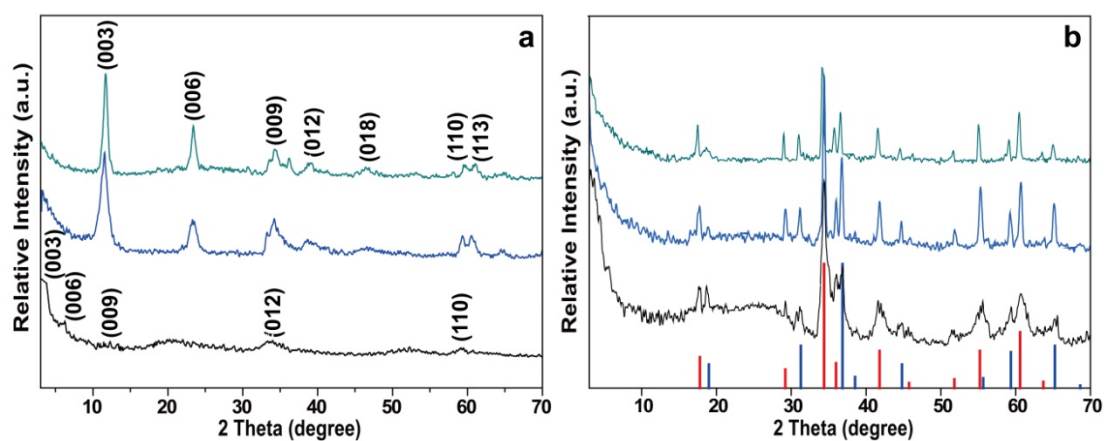

**Fig. S1** (a) CoSn-LDH (green line), CoAlSn-LDH (blue line) and LA<sup>-</sup> intercalated CoSn-LDH precursor (black line). (b) Co<sub>2</sub>SnO<sub>4</sub>/Co<sub>3</sub>O<sub>4</sub> (green line), Co<sub>2</sub>SnO<sub>4</sub>/Co<sub>3</sub>O<sub>4</sub>/Al<sub>2</sub>O<sub>3</sub> (blue line), Co<sub>2</sub>SnO<sub>4</sub>/Co<sub>3</sub>O<sub>4</sub>/C (black line) composites.

**Figure S2**

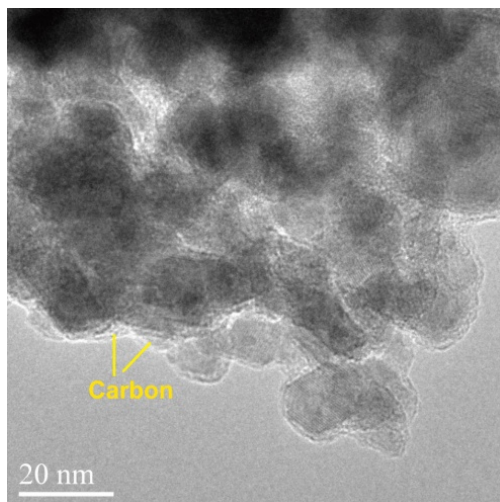

**Fig. S2** HRTEM image of  $\text{Co}_2\text{SnO}_4/\text{Co}_3\text{O}_4/\text{Al}_2\text{O}_3/\text{C}$  composite.

**Figure S3**

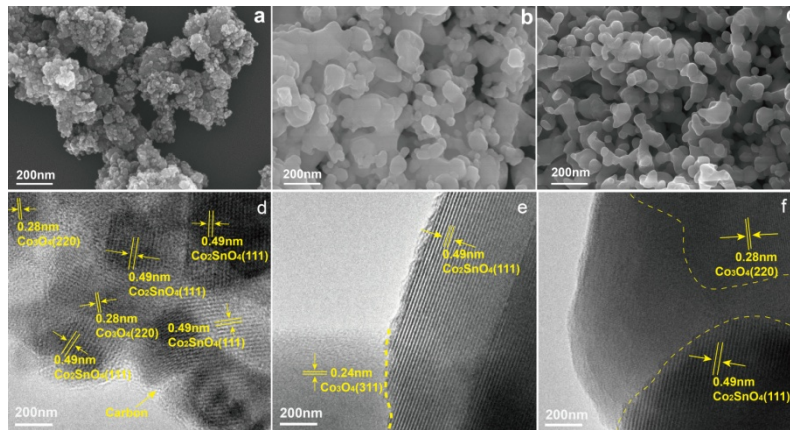

**Fig. S3** (a-c) SEM and (c-f) HRTEM images of different composites: (a, d) Co<sub>2</sub>SnO<sub>4</sub>/Co<sub>3</sub>O<sub>4</sub>/C, (b, e) Co<sub>2</sub>SnO<sub>4</sub>/Co<sub>3</sub>O<sub>4</sub>, and (c, f) Co<sub>2</sub>SnO<sub>4</sub>/Co<sub>3</sub>O<sub>4</sub>/Al<sub>2</sub>O<sub>3</sub>.

**Figure S4**

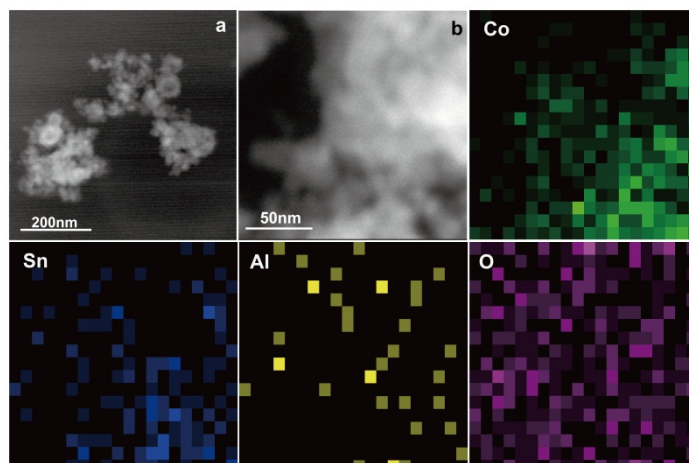

**Fig. S4** (a, b) HAADF-STEM images of  $\text{Co}_2\text{SnO}_4/\text{Co}_3\text{O}_4/\text{Al}_2\text{O}_3/\text{C}$  composite, and corresponding EDX mapping of elements Co, Sn, Al, and O.

Figure S5

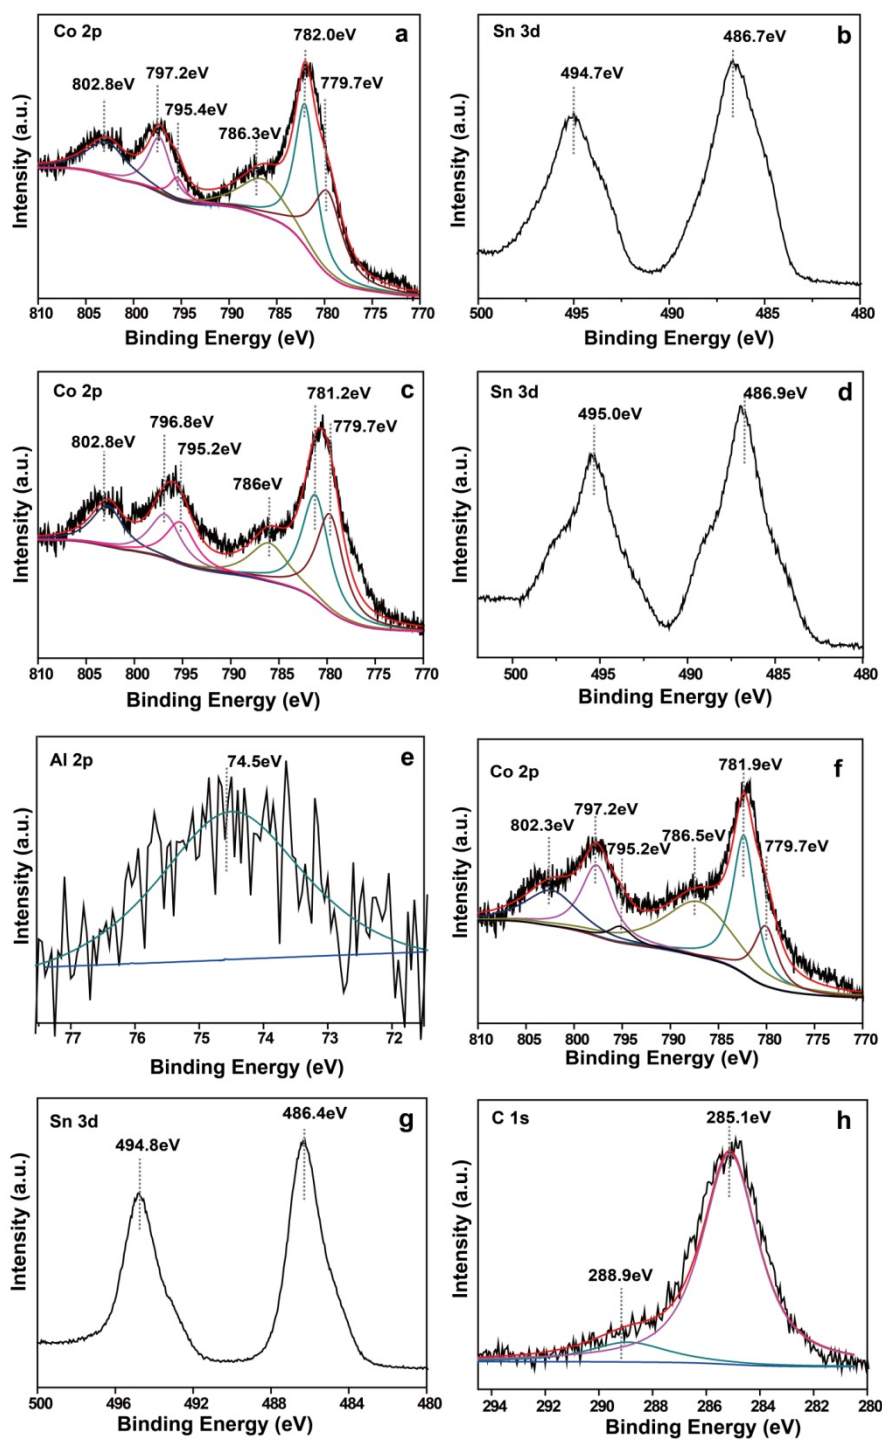

**Fig. S5** XPS spectra of  $\text{Co}_2\text{SnO}_4/\text{Co}_3\text{O}_4$  for (a) Co 2p, (b) Sn 3d,  $\text{Co}_2\text{SnO}_4/\text{Co}_3\text{O}_4/\text{Al}_2\text{O}_3$  for (c) Co 2p, (d) Sn 3d, (e) Al 2p,  $\text{Co}_2\text{SnO}_4/\text{Co}_3\text{O}_4/\text{C}$  for (f) Co 2p, (g) Sn 3d, (h) C 1s.



**Figure S6**

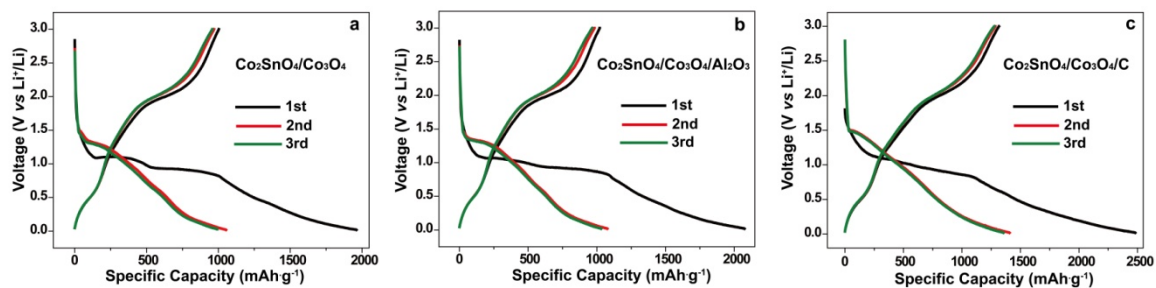

**Fig. S6** The first three charge-discharge profiles of different composite electrodes at 100 mA g<sup>-1</sup>: (a)  $\text{Co}_2\text{SnO}_4/\text{Co}_3\text{O}_4$ , (b)  $\text{Co}_2\text{SnO}_4/\text{Co}_3\text{O}_4/\text{Al}_2\text{O}_3$ , and (c)  $\text{Co}_2\text{SnO}_4/\text{Co}_3\text{O}_4/\text{C}$ .

**Figure S7**

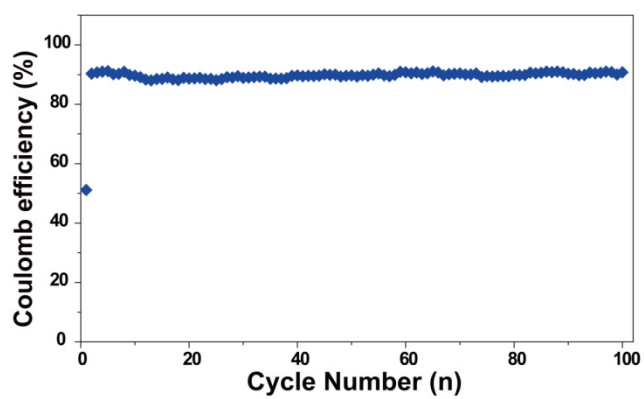

**Fig. S7** The plot of Coulombic efficiency vs. cycle number for the  $\text{Co}_2\text{SnO}_4/\text{Co}_3\text{O}_4/\text{Al}_2\text{O}_3/\text{C}$  electrode.



**Table S1**

**Table S1** Comparison of reversible specific capacity between the electrodes of Co<sub>2</sub>SnO<sub>4</sub>/Co<sub>3</sub>O<sub>4</sub>/Al<sub>2</sub>O<sub>3</sub>/C and the Co<sub>2</sub>SnO<sub>4</sub>- or Co<sub>3</sub>O<sub>4</sub>- based composites reported.

| Hybrid Nanomaterials                                                                                | Active material (wt. %) | Current Density (mA g <sup>-1</sup> ) | Cycle Number | Specific Capacity (mA h g <sup>-1</sup> ) | Reference  |
|-----------------------------------------------------------------------------------------------------|-------------------------|---------------------------------------|--------------|-------------------------------------------|------------|
| Co <sub>2</sub> SnO <sub>4</sub> nanocrystal                                                        | 60                      | 30                                    | 50           | 556                                       | [43]       |
| Co <sub>2</sub> SnO <sub>4</sub> /graphene                                                          | 60                      | 100                                   | 100          | 1000                                      | [7]        |
| Co <sub>2</sub> SnO <sub>4</sub> /MWCNTs                                                            | 80                      | 50                                    | 50           | 899                                       | [42]       |
| Co <sub>2</sub> SnO <sub>4</sub> /Co <sub>3</sub> O <sub>4</sub>                                    | 60                      | 100                                   | 50           | 703                                       | [24]       |
| Co <sub>3</sub> O <sub>4</sub> microsphere                                                          | 50                      | 50                                    | 30           | 1615                                      | [47]       |
| Co <sub>3</sub> O <sub>4</sub> /C                                                                   | 80                      | 100                                   | 50           | 1079                                      | [48]       |
| Co <sub>3</sub> O <sub>4</sub> /α-Fe <sub>2</sub> O <sub>3</sub>                                    | 100                     | 100                                   | 60           | 980                                       | [49]       |
| SnO <sub>2</sub> @Co <sub>3</sub> O <sub>4</sub>                                                    | 70                      | 100                                   | 100          | 962                                       | [50]       |
| Co <sub>2</sub> SnO <sub>4</sub> /Co <sub>3</sub> O <sub>4</sub> /Al <sub>2</sub> O <sub>3</sub> /C | 70                      | 100                                   | 100          | 1170                                      | this study |
